1 **Antifungal activity of *Conocephalum conicum*(L) Dumort. (Marchantiophyta) against**  
2 ***Fusarium oxysporum* f. sp. *lycopersici***

3 ***Kavita Negi*<sup>a\*</sup> and *Preeti Chaturvedi*<sup>b</sup>**

4 <sup>a</sup>Drug Standardization Research Unit, Central Council for Research in Unani Medicine,  
5 Ministry of AYUSH, New Delhi<sup>b</sup>Department of Biological Sciences, College of Basic  
6 Sciences and Humanities, G.B. Pant University of Agriculture & Technology, Pantnagar,  
7 Uttarakhand, India.

8 \*Corresponding author e mail: [negikavita123@gmail.com](mailto:negikavita123@gmail.com) Phone no-+91-7579473610

9 **Abstract**

10 Tomato, a high value vegetable crop, suffers huge production losses in tropics due to a wilt  
11 disease caused by *Fusarium oxysporum* f. sp. *lycopersici*. Present study was undertaken to find  
12 an effective biocontrol method to check fusarium wilt in order to curb the losses suffered by  
13 the crop growers. Organic extracts (acetone, methanol/ethanol) of thalloid bryophytes  
14 (*Conocephalum conicum* (L.) Dumort. and *Marchantiapapillata* Raddi subsp.  
15 *grossibarba* (Steph.) Bischl.) were tested against *F. oxysporum* f. sp. *lycopersici* using disc  
16 diffusion and micro broth dilution assay. Methanol extract of *C. conicum* (L.) Dumort.  
17 (CCDM) showed significantly high antifungal activity (85.5% mycelial inhibition;  
18 31.25 µg/mL MIC and 125 µg/mL MFC). Potential of methanol extract was tested in a  
19 glasshouse experiment on tomato, which illustrated the efficacy of the plant extract to control  
20 the fusarial wilt. Morphological and ultrastructural alterations in CCDM treated fusarium  
21 mycelia were observed in scanning electron microscopy. GC-MS analysis of CCDM extract  
22 showed the presence of 51 constituents, and the dominant compounds were bis (bibenzyl),  
23 acyclic alkanes, fatty acids, sesquiterpenoids and steroids. The study suggested that *C.*  
24 *conicum* being an efficient source of Riccardin C like antifungal compounds provides a potent  
25 and eco-friendly alternative to conventional fungicides in vegetables.

26 **Keywords:** Bryophytes, Biocontrol, *Conocephalum conicum*, *Fusarium oxysporum* f.  
27 *sp. lycopersici*, Antifungal, SEM and GC-MS.

## 28 1. Introduction

29 Tomato (*Solanum lycopersicum* L.) is used around the world due to its flavour, colour, anti-  
30 oxidative and anticancer properties (Gerszberg and Konka 2017). It is the world's largest  
31 consumed vegetable crop after potato, sweet potato, and onion and, it also tops the list of  
32 canned vegetables (Olaniyi et al. 2010). Presence of lycopene in tomato gives specific  
33 benefits against number of ailments.

34 Fusarium wilt, one of the most prevalent and widespread diseases of tomato, severely  
35 damages the crop as *Fusarium oxysporum* f. *slycopersici* (FOL) starts growing within the  
36 vascular tissues of the plant and impedes water supply to different parts of the plant ((Ignjatov  
37 et al. 2012, Moretti et al. 2008). Singh and Kamal (2012) reported 10-90% loss in tomato  
38 yield due to this wilt. Significant losses in tomato production in greenhouse condition and in  
39 fields have been reported by Amini and Sidovich (2010).

40 Carbendazime and propiconazole are some common fungicides which are highly effective  
41 against fusarium wilt (Manasa et al. 2017). Fungicides are synthetic in nature and may affect  
42 environment and human health adversely due to their toxicity, carcinogenicity and persistent  
43 nature (Fisher et al. 2018). Therefore, biocontrol measures seem to be a suitable and  
44 sustainable solution to control fusarium wilt. Using botanicals in controlling fusarium wilt  
45 provides an ecofriendly, cost-effective and non-toxic biocontrol method (Trda et al. 2019).  
46 Botanicals belonging to different plant groups viz., lichens and angiosperms have been  
47 reported to possess antifungal efficacy against *F. oxysporum* (Basile et al. 2015; Yeole et al.  
48 2016). Antifungal activities have also been reported in some bryophytes (Tadesse 2002;  
49 Kirisanth et al. 2020; Commisso et al. 2021).

50 Bryophyta, a very primitive and simplest group of the embryophytes, have acquired unique  
51 survival strategies. They lack protection shields like bark but possess variety of bioactive  
52 compounds against inhospitable environments. Rich repository of these secondary

53 metabolites viz.,benzyls, bis benzyl derivatives, sesquiterpenes, phenols etc. in bryophytes  
54 have protected them against microbes and, hence, enabled their survival in diverse habitats  
55 (Asakawa, 2017). In view of the above, an attempt was made in the present study to assess  
56 the efficacy of thalloidbryophytes for an effective control of *F. oxysporum* f.  
57 *splycopersici*employing *in vitro* and *in vivo* approaches.

## 58 2. Material and Methods

### 59 2.1 Collection of plant material

60 Based on the ethnomedicinal value reported by Glime (2017) and Negi et al(2018), two  
61 species of bryophytes (liverworts),*Conocephalumconicum* (L.) Dumort(Conocephalaceae)  
62 and *Marchantiapapillata*Raddi subsp. *grossibarba*(Steph.) Bischl.(Marchantiaceae) were  
63 collected from an altitudinal range of 200-2100m from Uttarakhand, India.*C. conicum* was  
64 collected from Mukteshwar (Altitude: 2100m, shady wall) and Dwarahat (Altitude: 1400m,  
65 moist wall). *M. papillata*was collected from Dwarahat (Altitude: 1400m, river basin) and  
66 Pantnagar (Altitude: 213m, moist wall).Voucher specimens of the collected species (NC501,  
67 NC502) were submitted to G.B. Pant University Herbarium, Pantnagar.

### 68 2.2 Preparation of plant extract

69 Collected plant samples were thoroughly washed under running tap water, shade dried,  
70 pulverized and extracted in 80 % ethanol/methanol and acetone (Analytical Grade, Sigma  
71 Aldrich). Extraction was performed using hot (Soxhlet) and cold percolation methods (10  
72 g/100 mL). The extracts were filtered through Whatman No. 1 filter paper and concentrated  
73 using a rotary evaporator(Biogen Scientific). The crude extract was dissolved in the  
74 respective solventfor the preparation of stock solution of 1mg/mL. The dilutions of different  
75 concentrations (100, 400, 700, 1000 µg/mL) were prepared from the stock solution and used  
76 for further study.

### 77 2.3Antifungal Assay

78

79 *Fusarium oxysporum*f. sp. *lycopersici*(FOL) was obtained from the Rhizosphere laboratory of  
80 Department of Biological Sciences, G.B. Pant University of Agriculture & Technology,  
81 Pantnagar(**Joshi et al. 2013**). The culture was revived on Potato dextrose agar(Himedia) at 27  
82 °C and the same was used for disc diffusion assay. For further experiments, inoculum was  
83 prepared by culturing FOL in potato dextrose broth in shake culture at same temperature for  
84 5-6 days.

85 For disc diffusion assay, Potato Dextrose Agar (PDA) medium was poured aseptically in the  
86 Petri plates (90 mm) and plates were allowed to solidify.Extract (20 µL) of varying  
87 concentrations in different solvents was pipetted out into the discs (Hi Media). Four discs (5  
88 mm), two treated (T) with plant extract (20µl) and two control (C) (20µl) along with the test  
89 fungus(as shown in **Fig 1**) were kept in the same Petri plate following a standard protocol of  
90 **Bauer (1966)** with minor modifications as suggested by **Negi and Chaturvedi**  
91 **(2016a)**.Carbendazim (Bavistin 50 %) was used as a positive control while the solvents were  
92 used as negative control in different plates. Inoculated fungal plates were incubated for 5  
93 days at 28± 2° C. Inhibition (%) of fungal growth was calculated.

94 
$$\% \text{ Inhibition} = \frac{\text{Mycelial growth (control)} - \text{Mycelial growth (treatment)}}{\text{Mycelial growth (control)}} \times 100$$

95

96

97 **FIGURE 1** |Plate of disc diffusion Assay. C = Control disc; T = Treatment disc; F=*Fusarium*  
98 *oxysporum*

#### 99 **2.4 Determination of Minimum Inhibitory/Fungicidal concentration**

100 Micro broth dilution assay was performed to determine the inhibitory and fungicidal  
101 concentration of bryophyte extracts using freshly prepared potato dextrose broth (PDB) as  
102 diluents (**Janovska et al. 2003**). Fresh and revived culture of the test fungus was diluted  
103 upto 100 folds in broth (100 µl of microorganism in 10 mL broth). Colony forming units  
104 (CFU) of the fungus were determined ( $1 \times 10^9$  CFU/mL) by taking OD at 620 nm using a UV-  
105 Visible spectrophotometer (Thermo Fisher Scientific)(**Sutton 2011**). Plant extracts, with  
106 1000 to 0.98 µg/mL concentration in two-fold dilution series were added to the test tubes  
107 containing fresh fungal cultures. All the tubes with fungal cultures were incubated at 28°C for  
108 72 h. The visible turbidity and optical density of the cultures were determined at 620 nm  
109 using spectrophotometer. The lowest concentration of the extract that inhibited the visible  
110 growth of the test microorganisms was recorded as minimum inhibitory concentration (MIC)  
111 and the test culture without any visible microbial growth was considered as minimum  
112 fungicidal concentration (MFC).

#### 113 **2.5 Soil collection and preparation of experimental pots**

114 Autoclaved loamy soil and river bed sand were used (sand: soil= 3:1) in the pot experiment.  
115 The pH and EC of this mixture were 8.15 and 65.7  $\mu\text{S}$ , respectively. Tomato seeds were  
116 surface sterilized in 1%  $\text{HgCl}_2$  for 2-3 min, rinsed three times in sterile distilled water and  
117 then dipped in sterile water for 1 day for imbibition. After drying in towel paper, the seeds  
118 were sown in the sterilized soil mixture in the Departmental glasshouse. Twenty days old  
119 tomato seedlings (four leaf stage) grown in autoclaved sand: soil (3:1) were transplanted into  
120 500g pot containing similar ratio of sand and soil. Plants were irrigated with tap water and  
121 left for 1-2 days for equilibration before setting up the experiment. The fungal inoculum was  
122 taken from PDB as it contained a large number of macroconidia. The population of FOL in  
123 the substrate was estimated as the number of CFU per gram of soil. Approximately  $2 \times 10^8$   
124 CFU/g of the fungal inoculum was used for pathogenesis in tomato roots. 1 ml of fungal  
125 inoculum suspension (made in water) was used for inoculating the seedlings by soil  
126 drenching method. The infection of FOL was confirmed by the symptoms of wilting in tomato  
127 plants within 15 days of the experiment.

128 Pot experiment was conducted in a completely randomized block design in the glass  
129 house with 5 replicates each using two different treatments viz., 125  $\mu\text{g}/\text{mL}$  and 31.25  $\mu\text{g}/\text{mL}$   
130 of aqueous solution of CCDM extract (EC1, EC2 respectively). All the treatments were  
131 applied in form of fine solution to the roots of tomato plants per pot until the roots absorbed  
132 the solution completely. The treatments were given one day prior and 15 days after FOL  
133 treatment. Three control(s) used were fusarium infested negative control (C+F), non-infested  
134 water control, and positive control (carbendazim). Pots were irrigated with deionised water  
135 as and when required.

136 Pots were maintained in the glasshouse under the following growth conditions: Temperature-  
137  $27^\circ\text{C}$ , Photoperiod- 16/8 hour day/night cycle, Light intensity-  $400 \text{ Em}^{-2}\text{s}^{-1}$ , (400-700 nm),  
138 Relative humidity- 60%.

## 139 **2.6 Observations**

140 Observations related to shoot length, root length, fresh weight and dry weight of tomato  
141 plants were taken for a period of 30 days after planting. After harvesting the plants, roots were  
142 washed thoroughly with tap water followed by washing with deionised water. Shoot and root  
143 length were measured from the soil base to the tip of the fully expanded leaf and soil base to  
144 the tip of the root. Shoot and root fresh weight (g) were weighed separately immediately after  
145 harvesting. Dry weight of shoot and roots were taken (g) separately after drying the samples  
146 at 60°C in an electric oven for 48 h.

## 147 **2.7 Gas Chromatography-Mass Spectroscopy (GC-MS)**

148 The crude methanol extract of *C. conicum* (CCDM) was filtered using 0.45 µm syringe filters.  
149 GC-MS analysis of the extract was carried out using a GC-MS System (Shimadzu) QP 2010  
150 equipped, with Rxi ®-5Sil MS capillary GC column (5 % phenyl 95 % dimethyl  
151 polysiloxane) with 30 m length, 0.25 mm diameter and 0.25 µm film thickness at Central  
152 Instrumentation Facility, Jawaharlal Nehru University, New Delhi. Helium was the carrier  
153 gas and used at a flow rate of 16.3 mL/min. Sampling time was maintained at 1 min. at a  
154 column pressure of 81.7 kPa. Column oven and injector temperatures were maintained at 80 °  
155 C and 270 ° C respectively. Samples (1 µl) were injected into the column with a split ratio of  
156 10:1. Names, molecular weight and structures of the individual compounds were identified by  
157 matching their mass fragmentation pattern with the National Institute of Standard Technology  
158 (NIST) Library.

## 159 **2.8 Scanning electron microscopic (SEM) study**

160 Effect of methanol extract of *C. conicum* on FOL was observed by SEM following a standard  
161 protocol of **Plodpai et al. (2013)** with minor modifications as reported by **Negi and**  
162 **Chaturvedi (2016a)**. SEM (JEOL6610LV) facility was provided by Department of Anatomy,

163 College of Veterinary and Animal Sciences, G.B. Pant University of Agriculture &  
164 Technology, Pantnagar, India.

## 165 **2.9 Statistical Analysis**

166 Analysis of variance was calculated using standard statistical methods (**Snedecor and**  
167 **Cochran 1994**). Disc diffusion assay was performed in triplicate while pot experiment was  
168 conducted using five replicates. Values were represented as mean  $\pm$ SEm. Mean value  
169 comparison was computed using four factorial ANOVA (for antifungal activity through disc  
170 diffusion assay). It revealed level of significance at  $P < 0.05$  and  $P < 0.01$  among different  
171 bryophyte species, solvents, concentrations and days. The analysis was carried out using IBM  
172 SPSS statistical software, version 15.0 (IBM, New York, USA).

## 173 **3. Results**

### 174 **3.1 Bioactivity of plant extract against *Fusarium oxysporum* f. sp. *lycopersici***

175 Organic extracts (alcohol and acetone) of *Conocephalum conicum* and *Marchantia papillata*  
176 showed significant antifusarium activity (Fig 2). Organic extracts (100-1000  $\mu$ g/mL) of  
177 bryophytes revealed dose - dependent inhibition of FOL (using disc diffusion assay) at  
178 different time intervals (2-5 days) (Table 1 and Fig 2). The methanol extract of *C. conicum*  
179 (CCDM) showed maximum per cent inhibition of FOL mycelial growth, values ranging from  
180  $25.31 \pm 0.005$  (after 2 days) to  $85.5 \pm 0.57$  (after 5 days) at the concentration of 100 and 1000  
181  $\mu$ g/mL respectively (Table 1). Similarly, acetone extract of *C. conicum* (CCDA) showed  
182 second highest per cent inhibition from  $31.4 \pm 0.57$  (after 2 days) to  $70.16 \pm 0.5$  (after 5 days) at  
183 100 and 1000  $\mu$ g/mL respectively. Minimum inhibitory concentration (MIC) and minimum  
184 fungicidal concentration (MFC) of different organic extracts of bryophytes ranged from 31.25  
185 to 500  $\mu$ g/mL and 125 to 500  $\mu$ g/mL respectively (Table 2). Again, CCDM extract was found  
186 most potent against FOL with lowest MIC (31.25  $\mu$ g/mL) and MFC (125  $\mu$ g/mL). Hence, the



187 effectiveness of CCDM extract was further assessed by chemical characterization and *in vivo*  
188 pot experiment.

189

190  
191

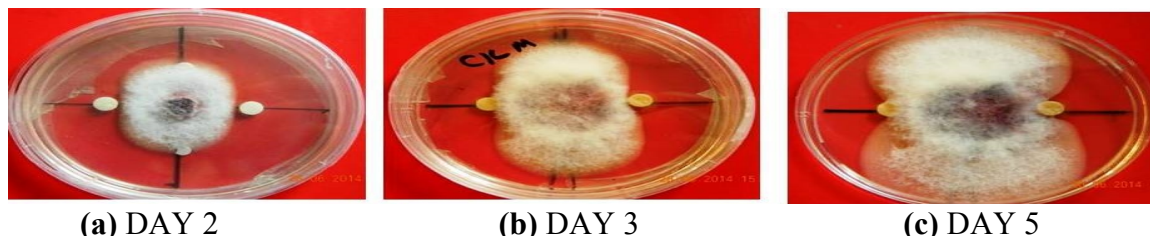

192  
193

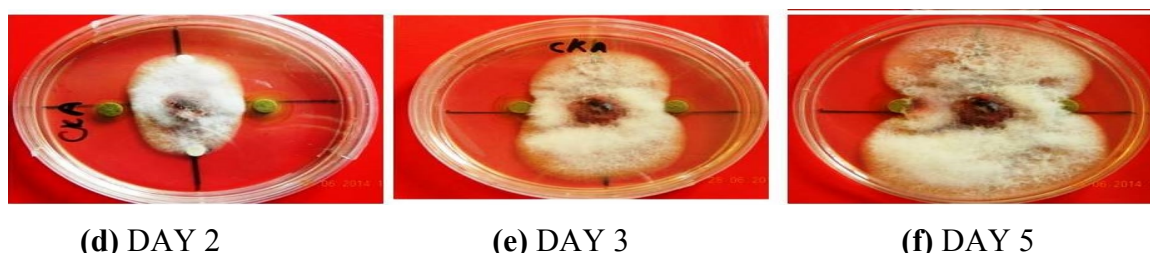

194  
195

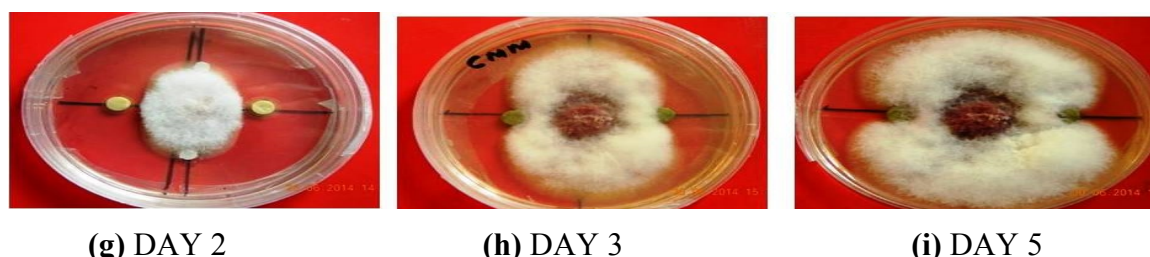

196

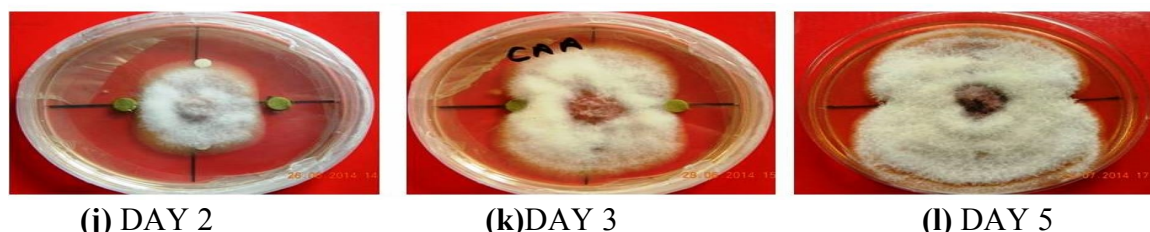

197 **FIGURE 2** | Disc diffusion plates showing growth inhibition of *Fusarium oxysporum* sp.  
198 *lycopersici* under different treatments. (a, b, c) Mycelia treated with CCDM extract, (d, e, f)  
199 Mycelia treated with CCDA extract, (g, h, i) Mycelia treated with CCMM extract, (j, k, l)  
200 Mycelia treated with CCMA extract (CCDM-methanol extract of *Conocephalum conicum*  
201 collected from Dwarahat, CCDA- acetone extract of *C. conicum* from Dwarahat, CCMM-  
202 methanol extract of *C. conicum* from Mukteshwar, CCMA-acetone extract of *C. conicum*  
203 from Mukteshwar).

204

### 205 3.2 Chemical Characterization

206 The most potent extract (CCDM) was chemically characterized using gas chromatography  
207 and mass spectrophotometry. Percentage and the retention timings of the major components

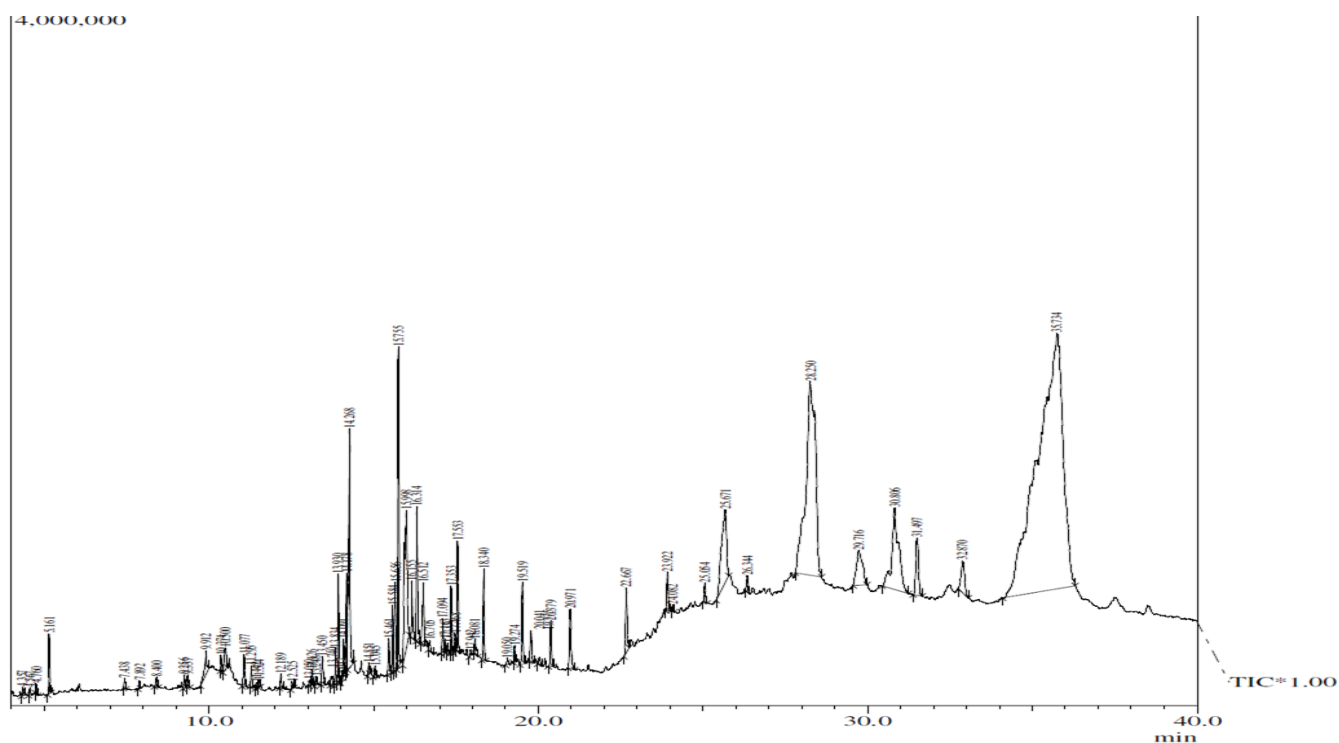

208  
209 **FIGURE 3| GC-MS chromatogram of methanol extract of *Conocephalum conicum* Dwarahat (CCDM)**

210 are given in Table 3 and Fig 3. It showed the presence of 51 constituents contributing 100%  
211 of the total extract. The results revealed that the extract was dominated by bis (bibenzyl) =  
212 riccardin c (64%), acyclic alkanes (eicosane = 5%), fatty acids (n-hexadecanoic acid =  
213 3.43%), sesquiterpenoids (10-epi- $\alpha$ -eudesmol = 1.6%) and steroids ( $\delta$ .5-ergosterol = 4.3%,  
214 stigmasterol = 1.2%).

### 215 **3.3 Effect of CCDM extract on hyphal and conidial morphology**

216 Scanning electron micrographs (SEM) demonstrated that 125  $\mu$ g/ml (EC1) of CCDM extract  
217 caused profound changes in hyphal morphology of FOL (Fig 4). Treated mycelia appeared  
218 wrinkled and ruptured. In contrast, SEM image of untreated fungus mycelia displayed smooth  
219 hyphal surface and intact conidia with typically tapered apices.

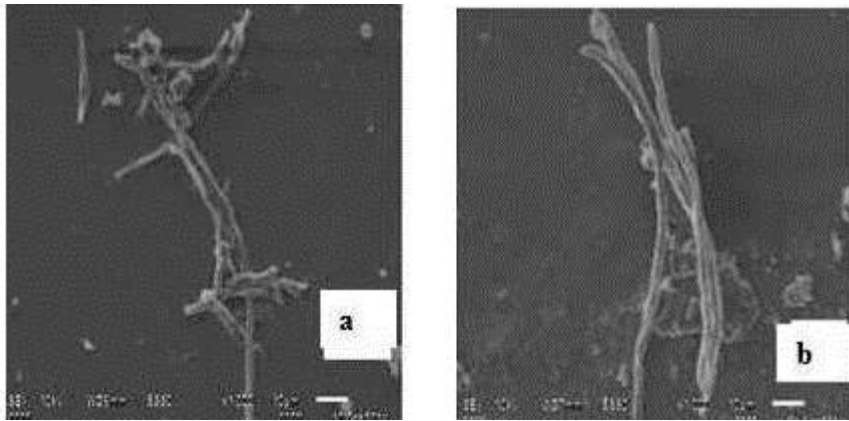

220

221 **FIGURE 4** | SEM images of (a) ruptured mycelia under EC1 treatment of CCDM extract (b)  
222 mycelia in control

### 223 **3.4 Effect of CCDM extract on growth parameters of tomato plants**

224 CCDM extract was tested for *in vivo* antifungal efficacy against FOL in a pot experiment  
225 using two most effective concentrations, EC1 (125  $\mu\text{g}/\text{mL}$ ) and EC2 (31.25  $\mu\text{g}/\text{mL}$ ) besides  
226 keeping a positive control (carbendazim treated plants + *Fusarium* inoculated), a negative  
227 control (*Fusarium* inoculated without any treatment) and a water control in the pot  
228 experiment (30 days). Results of the experiment are given in Fig 5, Fig 8.

#### 229 **3.4.1 Observations of shoot and root length**

230 Both EC1 and EC2 treated plants showed significantly higher shoot/root length compared to  
231 the negative control (*Fusarium* inoculated without any treatment) after 15 and 30 days of the  
232 treatment (Fig 5a, 5b). After 30 days, the EC1 treated plants showed comparable shoot length  
233 (35.50 $\pm$ 0.36cm) and root length (15.17 $\pm$ 0.27cm) as that of the positive control  
234 (36.77 $\pm$ 0.22cm; 16.27 $\pm$ 0.12cm). Shoot and root length was, however, significantly low in all  
235 other inoculated treatments compared to water control.

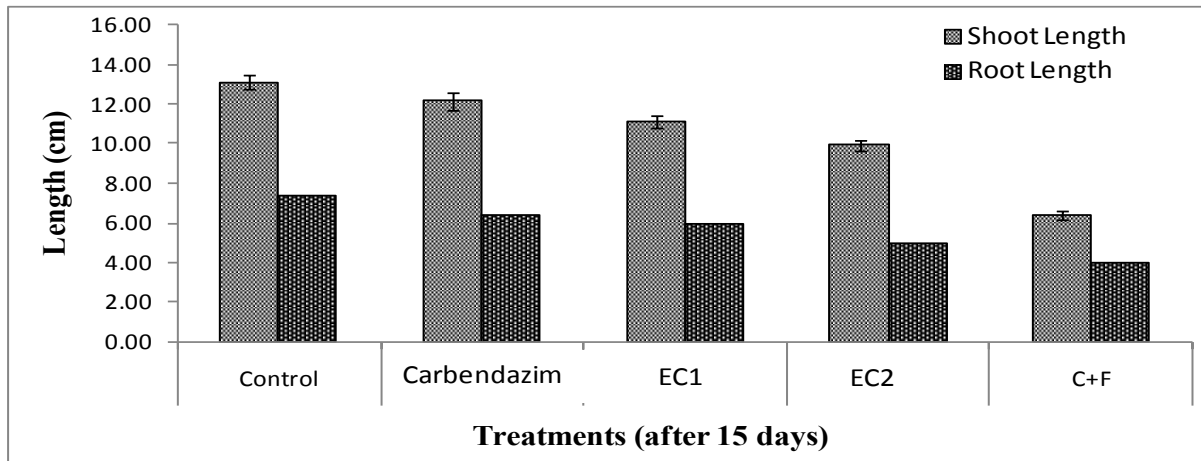

236

237 **FIGURE 5a** | Effect of different doses of CCDM extract on shoot/ root length of tomato  
238 plants(after 15 days). Control= water; Carbendazim = positive control; EC1 = 125 $\mu$ g/mL;  
239 EC2 = 31.25 $\mu$ g/mL; C+F = negative control (*Fusarium* infested without treatment). Data  
240 represents mean  $\pm$ SE from five replicates

241

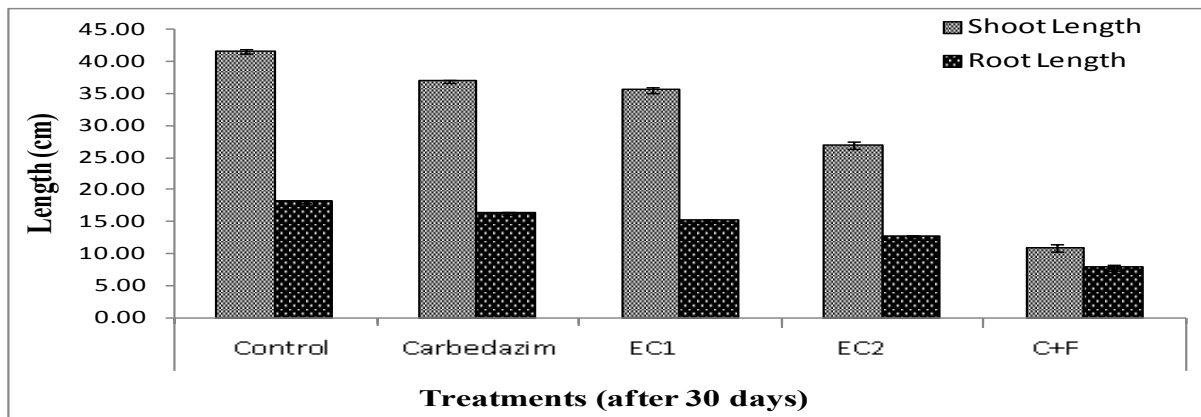

242

243 **FIGURE 5b** |Effect of different doses of CCDM extract on shoot/root length of tomato  
244 plants (after 30 days). Control=water, Carbendazim = positive control; EC1 = 125 $\mu$ g/mL;  
245 EC2 = 31.25 $\mu$ g/mL; C+F = negative control (*Fusarium* infested plant without treatment).  
246 Data represents mean  $\pm$ SE from five replicates

### 247 3.4.2 Shoot and root fresh weight

248 A similar trend of shoot and root fresh weight (with different treatments) was observed in  
249 the pot experiment after 15 and 30 days of setting up the experiment (Fig 6a, Fig 6b). After  
250 30 days, EC1 treated plants showed shoot and root fresh weight in EC1 treated plant was  
251 4.62 $\pm$ 0.18 g and 2.26 $\pm$ 0.03grespectively after 30 days, where as inpositive control it was  
252 4.91 $\pm$ 0.20g and 2.67 $\pm$ 0.01g after same time. Reduction of wilt in EC2 treated plants was  
253 significantly higher than the negative control.

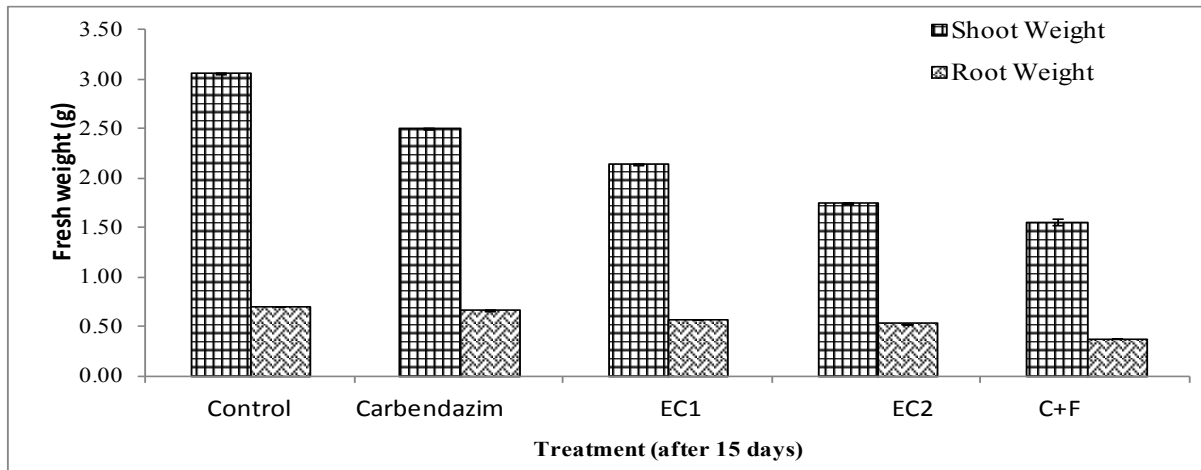

254

255 **FIGURE 6a** | Effect of different doses of CCDM extract on shoot and root fresh weight of  
256 tomato plants after 15 days. Control= water; Carbendazim= positive control; EC1=Extract  
257 concentration( $125\mu\text{g}/\text{mL}$ ); EC2= Extract concentration( $31.25\mu\text{g}/\text{mL}$ ); C+F =negative control  
258 (*Fusarium* infested plant without any treatment). Data represents mean  $\pm$ SE from  
259 fivereplicates

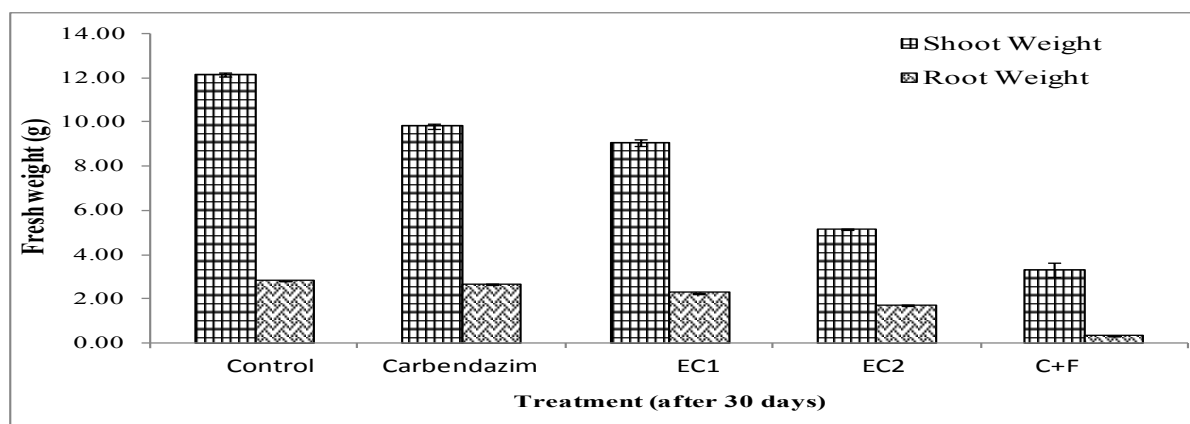

260

261 **FIGURE 6b** | Effect of different doses of CCDM extract on shoot and root fresh weight of  
262 tomato plants after 30 days. Control= water; Carbendazim= positive control; EC1=Extract  
263 concentration ( $125\mu\text{g}/\text{mL}$ ); EC2=Extract concentration( $31.25\mu\text{g}/\text{mL}$ ); C+F =negative control  
264 (*Fusarium* infested plant without any treatment). Data represents mean  $\pm$ SE from five  
265 replicates

266

### 267 3.4.3 Shoot and root dry weight

268 Shoot and root dry weight was significantly higher in both EC1 and EC2 treated plants as  
269 compared to negative control at all time intervals (Fig 7a, Fig 7b). After 30 days, dry weight  
270 of shoot and root was  $0.87\pm 0.22\text{g}$  and  $0.22\pm 0.005\text{g}$  respectively in EC1 treated plants whereas  
271 it was  $0.94\pm 0.25\text{g}$  and  $0.25\pm 0.002\text{g}$  respectively in positive control.



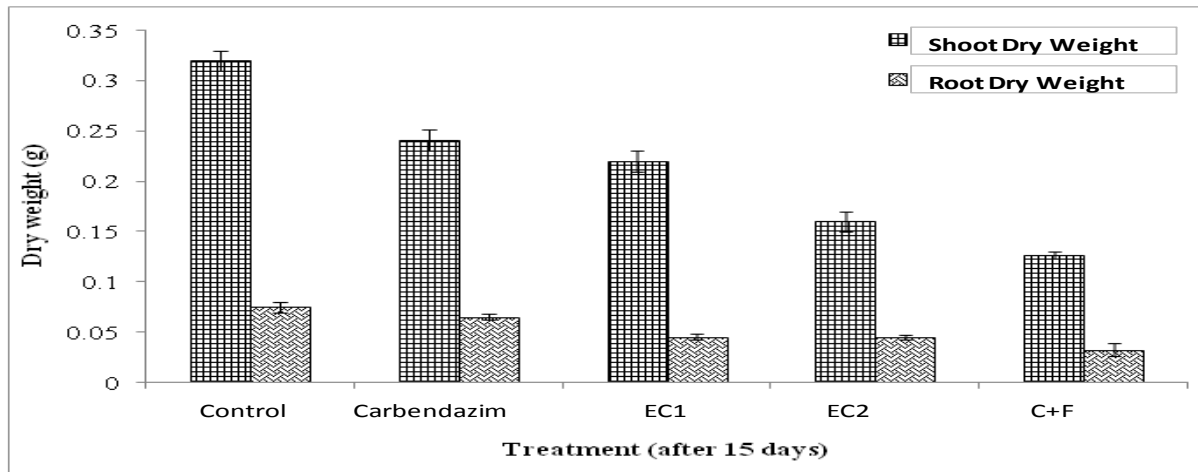

272

273 **FIGURE 7a** |Effect of different doses of CCDM extract on shoot and root dry weight of  
274 tomato plants after 15 days. Control=water; Carbendazim= positive control; EC1=Extract  
275 concentration( $125\mu\text{g}/\text{mL}$ ); EC2=Extract concentration ( $31.25\mu\text{g}/\text{mL}$ ); C+F =negative control  
276 (*Fusarium* infested plant without any treatment). Data represents mean  $\pm$ SE from five  
277 replicates

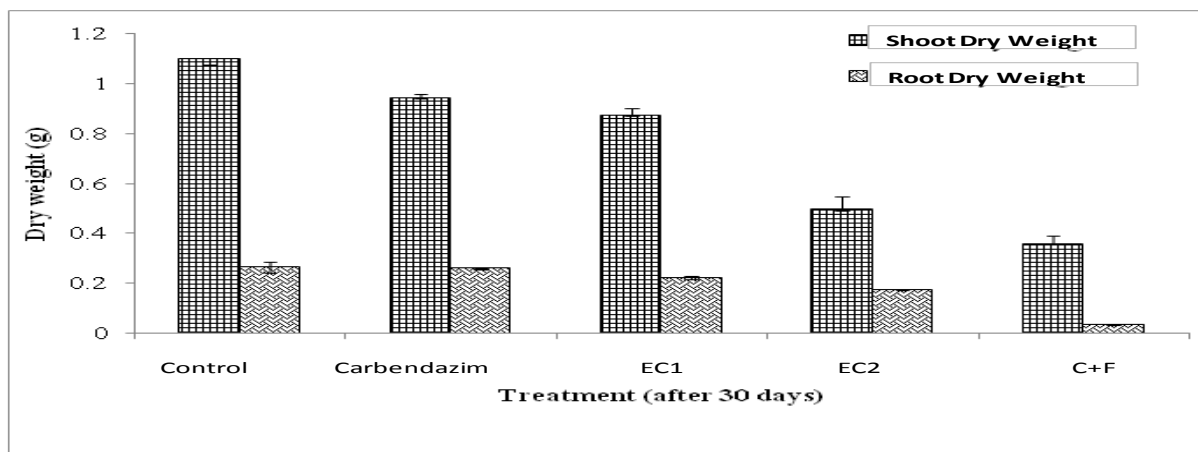

278

279 **FIGURE 7b** |Effect of different doses of CCDM extract on shoot and root dry weight of  
280 tomato plants after 30 days. Control=water, Carbendazim= positive control; EC1=Extract  
281 concentration ( $125\mu\text{g}/\text{mL}$ ); EC2=Extract concentration( $31.25\mu\text{g}/\text{mL}$ ); C+F =negative control  
282 (*Fusarium* infested plant without any treatment). Data represents mean  $\pm$ SE from five  
283 replicates

### 284 3.5 Discussion

285 To the best of our knowledge, no such study is available on the bioefficacyof  
286 bryophyte extracts against *Fusarium oxysporum* f. sp. *lycopersici* (FOL) using *in vitro* and *in*  
287 *vivo* approaches. However, reports on *in vitro* antifungal activity of bryophytes against other  
288 fungi have been given by Mewari et al. (2007), Deora and Guhil (2015), Negi et al. (2016a),  
289 Negi et al. (2020). In the present study, alcoholic extracts of bryophytes showed higher

290 antifungal activity than acetone extracts. Methanol extract of *C. conicum*(CCDM) showed  
291 highest mycelial inhibition followed by acetone extract (CCDA) as shown in **Table 1**. Other  
292 studies have also shown higher antimicrobial efficacy of alcoholic extract over acetone  
293 extract against different microorganisms (**Singh et al. 2011; Kandpal et al. 2016; Negi et al.**  
294 **2018**). Variable efficacies of crude organic extracts may be due to the differences in the  
295 polarities of the solvents which affect the effective extraction of antifungal compounds in  
296 different solvents (**Negi and Chaturvedi, 2016 b**).

297 In the present study, significantly higher antifungal activity was exhibited by CCDM  
298 extract (plant collected from Dwarahaat, lower altitude) in comparison to CCMM extract  
299 (plant collected from Mukteshwar, higher altitude). Similarly, higher antimicrobial activity  
300 was also reported in *Dumortierahirсутa* (Sw) Nees collected from lower altitude (**Mukherjee**  
301 **et al. 2012**).Difference in the bioactivity of the plants growing at different altitudes might be  
302 due to variation in accumulation of diverse secondary metabolites influenced by temperature  
303 and duration of exposure to UV radiation prevailing at those altitudes (**Zhang and Bjorn**  
304 **2009**). Habitat conditions and microniche also govern the responses of different ecotypes  
305 occupying diverse habitats.

306 Since maximum fungal growth inhibition (85.5%) was shown by CCDM extract, hence the  
307 same extract was chemically characterized to search for its important chemical constituents  
308 responsible for antifungal efficacy against FOL. Chemical characterization of CCDM extract  
309 showedthe presence of different bioactive compounds. viz., steroids, fatty acids,  
310 sesquiterpenoids, bibenzyls etc. Most of these compounds,like hexadecanoic acid,  
311 stigmasteroland  $\delta$ .5-ergostenolare antifungal in nature (**Ahmed et al. 2010; Mujeeb et al.**  
312 **2014; Abubakar and Majinda,2016**). Presence of hexadecanoic acid in organic extract of *C.*  
313 *conicum* was also reported by **Ludwiczuk et al. (2013)**. Liverworts also contain lipophilic oil  
314 bodies which possessed most characteristic antifungal compounds like bis (bibenzyl)

315 derivatives (riccardin C, riccardin F, isoriccardin C and marchantin A) (Xie et al. 2010;  
316 Asakawa 2013). Riccardin D isolated from Chinese *Marchantiapolyomorpha* showed  
317 antifungal activity against fluconazole – resistant *Candida albicans* strains (Asakawa and  
318 Ludwiczuk 2018). Riccardin C is one of the most important compounds of liverworts which  
319 shows strong antifungal activity (Asakawa et al. 2013). Interestingly, GC-MS analysis of  
320 CCDM extract in the present study, revealed the presence of very high concentration of  
321 riccardin C (64%), which is a major biomarker compound of liverworts having significant  
322 antifungal activity. Presence of high concentration of antifungal compounds like riccardin C,  
323 fatty acids and steroids in CCDM extract can be directly correlated with its significantly high  
324 antifungal activity. Cell membrane damage is the most possible mechanism responsible for  
325 antifungal nature of bioactive compounds (Parvuet al. 2010; Plodpai et al. 2013). In the  
326 present study, SEM images showed alteration in hyphal morphology which confirmed the  
327 fungistatic nature of CCDM extract. Scanning electron microimages clearly showed that  
328 EC1 concentration of CCDM extract as well as carbendazim treatment (positive control) caused  
329 substantial damage to the hyphal structure and hence controlled the growth of FOL mycelia.  
330 *In vitro* antifungal testing of CCDM extract was followed by an *in vivo* glasshouse  
331 experiment on tomato plants. The first *in vivo* greenhouse experiment using bryophyte  
332 extracts was performed on tomato plants against *Phytophthora infestans* (Frahm 2004). In the  
333 present study, different effective dosages of *C. conicum* extract were used to control  
334 FOL infection in tomato. Plants grown in EC1 amended pots attained significantly higher  
335 shoot and root height, shoot and root fresh weight and dry weight as compared to EC2 and  
336 the negative control. All these parameters were quite close to the positive control and  
337 indicated significant biocontrol potential of CCDM. Fusarium wilt caused blockage inside the  
338 xylem vessels by mycelia producing microconidia, which travel upward in the transpiration  
339 stream (Okungbowa and Shittu 2012). Interruption of the xylem vessels and transpiration



340 stream caused wilting in fusarium infested plants. It also caused poor development of lateral  
341 roots because of high infection rate (**Loganathan et al. 2009**). Poor root and shoot growth was  
342 also seen in fusarium infested plants in the present study. However, tomato treated plants  
343 with EC1 and EC2 dosage of CCDM could overcome the biological stress caused by the  
344 fungus and showed significantly higher root and shoot growth parameters compared to  
345 fusarium control (C+F). Here, in the study, EC1 concentration of CCDM extract was found to  
346 be more effective than EC2. Chemical characterization of CCDM extract revealed presence  
347 of large number of antifungal compounds. One of the major bioactive compounds of CCDM  
348 extract was riccardin C which is a well known antifungal compound and contributes  
349 significantly to the antifungal potential of *C. conicum*.

### 350 **3.6 Conclusion**

351 The present study was aimed to find an ecofriendly biological control of *Fusarium*  
352 *oxysporum* f. sp. *lycopersici* (FOL) from lesser known cryptogamic plants viz., bryophytes.  
353 The first step to meet the objective was finding a potent bryophyte viz.,  
354 *Conocephalum conicum*, which inhibited the mycelia growth of FOL (85 % per cent  
355 inhibition) in a laboratory test. The second step was to find out the effective dosage of the  
356 biocontrolling botanical. The effective concentration (125 µg/ml) of the methanolic extract of  
357 *C. conicum* disrupted the hyphal structure and emerged as the most potent dosage to control  
358 fusarium wilt under glasshouse conditions as well. To the best of our knowledge, this is the  
359 first study to report the use of organic extracts of *C. conicum* to control *F. oxysporum* f. sp.  
360 *lycopersici* using *in vitro* and *in vivo* approaches. Present study proved the antifungal potential  
361 of crude methanol extract of *C. conicum* (owing to the presence of riccardin C and other  
362 antimicrobial compounds). Based on the present study, *C. conicum* can be utilized as an  
363 environment friendly botanical fungicide providing a promising alternative to chemicals.  
364 However, still extensive field and advanced ultra structural studies are needed to understand the

365 molecular mode of interaction between the bioactive compound and the pathogen. Procuring  
366 enough quantity of the material is another challenge that can be tackled by scaling up their  
367 propagation in bioreactors.

### 368 **Acknowledgements**

369 We are thankful to Dr. S.D. Tewari, MMV College Haldwani, Kumaon University, Nainital  
370 for identification of plants. The generous help in authentication of plant identity rendered by  
371 Dr. A.K. Asthana and Dr. Vinay Shahu, NBRI, Lucknow is also duly acknowledged. Authors  
372 are highly thankful to Uttarakhand Council of Science and Technology for funding this work.  
373 The work was supported by research grant (File No. UCS&T/R&D/LS-29/11-12/4345/2  
374 dated 14-(03-2012) offered by Uttarakhand Council of Science & Technology to PC. KN  
375 was awarded research fellowship by the council.

### 376 **References**

377 Abubakar MN, Majinda RRT. GC-MS analysis and preliminary antimicrobial activity of  
378 *Albizia adianthifolia* (Schumach) and *Pterocarpus angolensis* (DC). *Medicines*. 2016; 3(1):3.  
379 doi:10.3390/medicines3010003.

380 Ahmed Y, Sohrab MH, Al-Reza SM, Tareq FS, Hasan CM, Sattar MA. Antimicrobial and  
381 cytotoxic constituents from leaves of *Sapium baccatum*. *Food and Chem Toxicol*. 2010;  
382 4(8):549-552.

383 Amini J, Sidovich DH. The effects of fungicides on *Fusarium oxysporum* f. Sp. *lycopersici*  
384 associated with Fusarium Wilt of tomato. *J Plant Prot Res*. 2010; 50(2):172-178.

385 Asakawa A, Ludwiczuk A. Chemical constituents of bryophytes: structures and biological  
386 activity. *J Nat Prod*. 2018; 81(3):641–660.

387 Asakawa Y. The isolation, structure elucidation, and bio- and total synthesis of bis-bibenzyls,  
388 from liverworts and their biological activity. *Nat Prod Commun*. 2017; 12(8):1335-1349.

- 389 Asakawa Y, Ludwiczuk A, Nagashima F. Phytochemical and biological studies of  
390 bryophytes. *Phytochem.* 2013; 91:52-80.doi: 10.1016/j.phytochem.2012.04.012.
- 391 Basile A, Rigano D, Loppi S, Di S A, Nebbioso A, Sorbo S, Altucci L. Antiproliferative,  
392 antibacterial and antifungal activity of the lichen *Xanthoria parietina* and its secondary  
393 metabolite parietin. *Int J Mol Sci.* 2015; 16(4):7861-7875.
- 394 Bauer AW, Kirby WM, Sherris JC, Turck M. Antibiotic susceptibility testing by standard  
395 single disk method. *Am J Clin Pathol.* 1966; 45(4):493-496.
- 396 Commisso M, Guarino F, Marchi L, Muto A, Piro A, Degola F. Bryo-Activities: A review on  
397 how bryophytes are contributing to the arsenal of natural bioactive compounds against fungi.  
398 *Plants.* 2021; 10:203. [https://doi.org/ 10.3390/plants10020203](https://doi.org/10.3390/plants10020203)
- 399 Deora GS, Guhil N. Phytochemical analysis and antifungal activity of moss  
400 *Bryumcellulare* against some phytopathogenic fungi. *Int J Pharm Sci.* 2015; 6(2): 688.
- 401 Frahm JP. Recent developments of commercial products from bryophytes. *The Bryologist.*  
402 2004; 107(3):277-283.
- 403 Fisher MC, Hawkins NJ, Sanglard D, Gurr SJ. Worldwide emergence of resistance to  
404 antifungal drugs challenges human health and food security. *Science.*2018; 360(6390):739-  
405 742. doi: 10.1126/science.aap7999.
- 406 Gerszberg A, Konka KH. Tomato tolerance to abiotic stress: a review of most often  
407 engineered target sequences. *Plant Growth Regul.* 2017; 83(2):175-198. doi: 10.1007/s10725-  
408 017-0251-x.
- 409 Glime JM. Medical uses: medical conditions. In: JM Glime (ed) *Bryophyte Ecology,*  
410 (Michigan Technological University and the International Association of Bryologists), Chapt.  
411 2-1:5, Uses. Ebook 2-1-1. 2017.

- 412 Ignjatov M, Milosevic D, Nikolic Z, GvozdanovicVJ, Jovicic D, Zdjelar G. *Fusarium*  
413 *oxysporum* as causal agent of tomato wilt and fruit rot. PesticPhytomed (Belgrade). 2012;  
414 27(1):25-31. doi: 10.2298/PIF1201025I.
- 415 Janovska D, Kubikova K, Kokoska L. Screening for antimicrobial activity of some medicinal  
416 plants species of traditional Chinese medicine. Czech J Food Sci. 2003; 21(3):107-110.
- 417 Joshi M, Srivastava R, Sharma AK, Prakash A. Isolation and characterization of *Fusarium*  
418 *oxysporum*, a wilt causing fungus, for its pathogenic and non-pathogenic nature in tomato  
419 (*Solanum lycopersicum*). J Nat Appl Sci. 2013; 5:1, 108-117.
- 420 Kandpal V, Chaturvedi P, Negi K, Gupta S, Sharma A. Evaluation of antibiotic and  
421 biochemical potential of bryophytes from kumaun hills and tarai belt of Himalayas. Int J  
422 Pharm Pharm Sci. 2016; 8(6): 65-69.
- 423 Kirisanth A, Nafas MNM, Dissanayake RK, Wijayabandara J. Antimicrobial and alpha-  
424 amylase inhibitory activities of organic extracts of selected Sri Lankan bryophytes. Evid  
425 Based Complement Alternat Med. 2020; pp 2020.
- 426 Loganathan M, Rai AB, Ramesh R, Sharma BK, Rai RK, Rai M et al. Vascular wilt diseases-  
427 a menace in vegetable crops. Vegetable Science. 2009; 36(1): 1-13.
- 428 LudwiczukA,Odrzykoski IJ, Asakawa Y. Identification of cryptic species within liverwort  
429 *Conocephalumconicum* based on the volatile components. Phytochem. 2013; 95: 234-241.
- 430 Manasa BG, Somashekara YM, Shankara K, Swamy C. Efficacy of fungicides in control of  
431 *Fusarium oxysporum* f. sp. *dianthi*, the cause of wilt in carnation. Int J Curr Microbiol App  
432 Sci. 2017; 6(10): 2559-2565.
- 433 Manoj GS, Murugan K. Phenolic profiles, antimicrobial and antioxidant potentiality of  
434 methanolic extract of a liverwort, *Plagiochila beddomei*Steph. Indian J Nat Prod Resour.  
435 2012; 3(2): 173-183.

- 436 Mewari N, Chaturvedi P, Kumar P, Rao PB. Antimicrobial activity of moss extracts against  
437 different plant pathogens. *J Mycol Plant Pathol.* 2007; 37(2):359-60.
- 438 Moretti M, Gilardi G, Gullino ML, Garibaldi A. Biological control potential of  
439 *Achromobacter xylosoxydans* for suppressing fusarium wilt of tomato. *Int J Bot.* 2008;  
440 4(4):369–375.
- 441 Mujeeb F, Bajpai P, Pathak N. Phytochemical evaluation, antimicrobial activity, and  
442 determination of bioactive components from leaves of *Aegle marmelos*. *BioMed Research*  
443 *International*,2014;pp 11.<http://dx.doi.org/10.1155/2014/497606>.
- 444 Mukherjee S, De A, Ghosh P, Dey A. In vitro antibacterial activity of various tissue types of  
445 *Dumortierahirsuta* (Sw) Nees from different altitudes of eastern Himalaya. *Asian Pac J Trop*  
446 *Dis.* 2012; 2: S285-290.
- 447 Negi K, Chaturvedi P. In vitro antimicrobial efficacy of *Rhynchosygium vagans* A. Jaeger  
448 (moss) against commonly occurring pathogenic microbes of Indian sub-tropics. *Asian Pac J*  
449 *Trop Dis.* 2016a; 6(1):10-14.
- 450 Negi K, Chaturvedi P. Anti bacterial potential of lesser known Himalayan medicinal plants  
451 viz., bryophytes. *The Bioscan.* 2016b; 11(4):2231-2235.
- 452 Negi K, Tewari SD, Chaturvedi P. Antibacterial activity of *Marchantiapapillata*Raddi subsp.  
453 *grossibarba* (Steph.)Bischn. against *Staphylococcus aureus*. *Indian J Tradit Knowle.*2018;  
454 17(4):763-769.
- 455 Negi K, Asthana AK, Chaturvedi P. GC-MS analysis and antifungal activity of acetone extract of  
456 *Conocephalum conicum* (L) Underw (Liverwort) against aflatoxins producing fungi. *South*  
457 *African J of Botany.* 2020; 131: 384-390.<https://doi.org/10.1016/j.sajb.2020.02.035>
- 458 Okungbowa FI, Shittu HO. Fusarium wilts: An overview. *Environ Res J.* 2012; 6(2):122-134.
- 459 Olaniyi JO, Akanbi WB, Adejumo TA, Akande OG. Growth, fruit yield and nutritional  
460 quality of tomato varieties. *Afr J Food Sci.* 2010; 4(6):398-402.

- 461 Pant G, Tewari SD. Various human uses of bryophytes in the Kumaun region of northwest  
462 Himalaya, Bryologist. 1989; 92(1):120-122.
- 463 Parvu M, Parvu AE, Craciun C, Tudoran LB, Vlase L, Tamas M et al. Changes in *Botrytis*  
464 *cinerea* conidia caused by *Berberis vulgaris* extract. Not Bot Horti Agrobot Cluj Napoca.  
465 2010; 38(3):15-20.
- 466 Plodpai P, Chuenchit S, Petcharat V. Anti-Rhizoctoniasolani activity by *Desmos chinensis*  
467 extracts and its mechanism of action. Crop Prot. 2013; 43: 65-71.
- 468 Singh AK, Kamal S. Chemical control of wilt in tomato (*Lycopersicon esculentum* L.). Int J  
469 Horticulture. 2012; 2(2):5- 6.
- 470 Singh M, Singh S, Nath V, Sahu V, Rawat AK. Antibacterial activity of some bryophytes used  
471 traditionally for the treatment of burn infections. Pharma Biol. 2011; 49(5):526-530. doi:  
472 10.3109/13880209.2010.523007.
- 473 Snedecor GW, Cochran WG. Statistical methods, 5th ed. Iowa, Ames (IOWA, USA: State  
474 University Press; 1994.
- 475 Sutton S. Measurement of microbial cells by optical density. J Valid Technol. 2011; 17(1):46-49.
- 476 Tadesse M. Characterization and mode of action of natural plant products against leaf fungal  
477 pathogens. [dissertation]. Shaker Verlag: Rheinischen Friedrich-Wilhelms-Universität Bonn;  
478 2002.
- 479 Trda L, Janda M, Mackova D, Pospíchalova R, Dobrev P, Burketova L, et al. Dual mode of  
480 the saponin aescin in plant protection: antifungal agent and plant defense  
481 elicitor. Front Plant Sci. 2019; 10, 1448.
- 482 Xie CF, Qu JB, Wu XZ, Liu N, Ji M, Lou HX. Antifungal macrocyclic bis (bibenzyls) from  
483 the Chinese liverwort *Plagiochasma intermedium* L. Nat Prod Res. 2010; 24(6):515-520.
- 484 Yeole G, Kotkar HM, Mendki PS. Herbal fungicide to control Fusarium wilt in tomato  
485 plants. Biopestic Int. 2016; 12: 25-35.

- 486 Zhang AWJ, Bjorn LO. The effect of ultraviolet radiation on the accumulation of medicinal  
487 compounds in plants. *Fitoterapia*. 2009; 80(4):207-218.

**Table 1** |Growth inhibition (%) of *Fusarium oxysporum*f. sp. *lycopersici*(FOL)with different extracts of bryophytes

| Name of Bryophyte extracts | Percent Inhibition (%) |                     |            |                  |            |            |                   |            |            |                    |            |            |      |      |      |
|----------------------------|------------------------|---------------------|------------|------------------|------------|------------|-------------------|------------|------------|--------------------|------------|------------|------|------|------|
|                            | Conc. (100µg/mL)       |                     |            | Conc. (400µg/mL) |            |            | Conc. (700 µg/mL) |            |            | Conc. (1000 µg/mL) |            |            |      |      |      |
|                            | Day 2                  | Day 3               | Day 5      | Day 2            | Day 3      | Day 5      | Day 2             | Day 3      | Day 5      | Day 2              | Day 3      | Day 5      |      |      |      |
| CCDM                       | 25.31±0.05             | 26.86±0.05          | 47.84±0.57 | 50.84±0.57       | 44.13±0.56 | 51.35±0.55 | 66.10±0.28        | 67.58±1.14 | 75.12±1.1  | 82.03±0.5          | 84.4±1.1   | 85.5±0.57  |      |      |      |
| CCDA                       | 31.4±0.57              | 49.34±0.57          | 42.86±0.57 | 49.58±0.57       | 41.09±0.57 | 49.72±1.15 | 60.95±0.57        | 66.42±0.66 | 64.91±0.55 | 65.28±0.57         | 66.43±0.57 | 70.16±0.57 |      |      |      |
| CCMM                       | 22.43±0.88             | 27.23±0.57          | 27.45±0.57 | 53.84±0.57       | 61.63±0.33 | 43.88±0.57 | 58.08±1.1         | 59.56±0.28 | 61.36±0.57 | 56.25±0.57         | 62.08±1.11 | 62.79±0.57 |      |      |      |
| CCMA                       | 23.63±0.33             | 25.54±0.57          | 24.89±0.57 | 32.5±0.57        | 30.95±0.66 | 41.07±0.33 | 17.18±0.33        | 43.43±0.57 | 49.10±0.66 | 47.5±0.57          | 35.71±0.57 | 58.23±0.57 |      |      |      |
| MPDE                       | 20.6±0.57              | 23.33±0.57          | 21.54±0.57 | 46.80±0.57       | 50.88±0.88 | 49.15±0.66 | 36.09±0.66        | 51.6±0.33  | 49.74±0.57 | 31.66±0.57         | 45.61±0.57 | 55.97±0.33 |      |      |      |
| MPDA                       | 12.56±0.66             | 14.71±0.57          | 14.34±0.57 | 12.54±0.57       | 13.63±0.28 | 34.73±0.57 | 29.26±0.33        | 32.63±0.33 | 41.02±0.33 | 46.58±0.33         | 49.22±0.57 | 54.02±0.33 |      |      |      |
| MPPE                       | 12.48±1.1              | 14.48±0.66          | 14.48±1.15 | 18.64±0.33       | 56.25±0.33 | 43.95±0.33 | 24±0.66           | 40.47±0.66 | 44.96±0.57 | 42.27±1.15         | 40.88±0.66 | 53.97±0.33 |      |      |      |
| MPPA                       | 11.23±0.33             | 13.56±0.66          | 14.67±1.15 | 16.45±0.66       | 51±0.88    | 41.89±0.33 | 20±0.66           | 36.89±0.66 | 41.96±0.5  | 40.27±1.1          | 39±0.66    | 51.89±0.33 |      |      |      |
| Carbendazim                | 72.0±0.66              | 78.48±0.33          | 88.87±1.1  | ND               | ND         | ND         | ND                | ND         | ND         | ND                 | ND         | ND         |      |      |      |
|                            | Bryophyte species (A)  | Organic solvent (B) | Conc (C)   | Days (D)         | AB         | AC         | AD                | BC         | BD         | CD                 | ABC        | ABD        | ACD  | BCD  | ABCD |
| CD at 1%                   | 0.39                   | 0.27                | 0.39       | 0.34             | 0.55       | 0.79       | 0.68              | 0.96       | 0.48       | 0.68               | 1.11       | 0.96       | 1.37 | 0.96 | 1.9  |
| CD at 5%                   | 0.30                   | 0.21                | 0.30       | 0.26             | 0.42       | 0.60       | 0.52              | 0.73       | 0.36       | 0.52               | 0.85       | 0.73       | 1.04 | 0.73 | 1.47 |
| SEm                        | 0.10                   | 0.07                | 0.10       | 0.09             | 0.15       | 0.21       | 0.18              | 0.26       | 0.13       | 0.18               | 0.30       | 0.26       | 0.37 | 0.26 | 0.53 |

*CCDM-methanol extract of Conocephalum conicum from Dwarahat, CCDA- acetone extract of C. conicum from Dwarahat, CCMM-methanol extract of C. conicum from Mukteshwar, CCMA-acetone extract of C. conicum from Mukteshwar, MPDE- ethanol extract of Marchantiapapillata from Dwarahat, MPDA- acetone extract of M. papillata from Dwarahat, MPPE-ethanol extract of M. papillata from Pantnagar, MPPA-acetone extract of M. papillata from Pantnagar, Conc.-Concentration, ND-not determined. All the experiments were performed in triplicates. Mean value (±SEm) with four factorial ANOVA revealed level of significance at P<0.05 and P<0.01 among different bryophyte species, solvents, concentrations and days.*



**Table 2** | Minimum Inhibitory Concentrations (MIC) and Minimum Fungicidal Concentrations (MFC) of different extracts of bryophytes against *Fusarium oxysporum* f. sp. *lycopersici*.

| Name of Bryophyte extracts | Minimum Inhibitory Concentration MIC ( $\mu\text{g/mL}$ ) | Minimum Fungicidal Concentration MFC ( $\mu\text{g/mL}$ ) |
|----------------------------|-----------------------------------------------------------|-----------------------------------------------------------|
| CCDM                       | 31.25                                                     | 125                                                       |
| CCDA                       | 62.5                                                      | 250                                                       |
| CCMM                       | 62.5                                                      | 250                                                       |
| CCMA                       | 125                                                       | 500                                                       |
| MPDE                       | 125                                                       | 500                                                       |
| MPDA                       | 125                                                       | -                                                         |
| MPPE                       | 250                                                       | -                                                         |
| MPPA                       | 500                                                       | -                                                         |

*CCDM*-methanol extract of *Conocephalum conicum* from Dwarahat, *CCDA*- acetone extract of *C. conicum* from Dwarahat, *CCMM*-methanol extract of *C. conicum* from Mukteshwar, *CCMA*-acetone extract of *C. conicum* from Mukteshwar, *MPDE*- ethanol extract of *Marchantiapapillata* from Dwarahat, *MPDA*- acetone extract of *M. papillata* from Dwarahat, *MPPE*-ethanol extract of *M. papillata* from Pantnagar, *MPPA*-acetone extract of *M. papillata* from Pantnagar, (-)=did not show fungicidal concentration.

**Table 3** |Chemical characterization (Gas Chromatography- Mass Spectrometry) of CCDM extracts (methanol extract of *Conocephalum conicum* collected from Dwarahat).

| S.No. | Retention time | Name of compound           | Area % |
|-------|----------------|----------------------------|--------|
| 1     | 4.357          | 1,2,3-propanetriol         | 0.1    |
| 2     | 5.161          | 2,3-dimethyl-2-pentanol,   | 0.4    |
| 3     | 7.438          | 4-hydroxy, benzaldehyde,   | 0.1    |
| 4     | 7.892          | 2,7,10-trimethyl-dodecane, | 0.1    |
| 5     | 9.256          | humulen-(v1)               | 0.1    |
| 6     | 9.357          | $\alpha$ .-selinene        | 0.1    |
| 7     | 9.912          | dodecanoic acid            | 0.4    |
| 8     | 10.374         | limonen-6-ol, pivalate     | 0.1    |

|    |        |                                                            |      |
|----|--------|------------------------------------------------------------|------|
| 9  | 10.500 | $\alpha$ -methyl mannofuranoside                           | 0.3  |
| 10 | 11.077 | alloaromadendrene oxide-(1)                                | 0.3  |
| 11 | 11.295 | Globulol                                                   | 0.2  |
| 12 | 12.189 | tetradecanoic acid                                         | 0.1  |
| 13 | 12.525 | (-)-loliolide                                              | 0.1  |
| 14 | 13.126 | 6,10,14-trimethyl-2-pentadecanone                          | 0.1  |
| 15 | 13.248 | tetradecanoic acid                                         | 0.1  |
| 16 | 13.450 | diisobutyl phthalate                                       | 0.3  |
| 17 | 13.740 | methyl (9z)-9-octadecenoate                                | 0.1  |
| 18 | 13.834 | methyl ester, (z)-9-hexadecenoic acid                      | 0.2  |
| 19 | 13.930 | hexadecanoic acid, methyl ester                            | 0.7  |
| 20 | 14.091 | (z)-7-tetradecenal                                         | 0.3  |
| 21 | 14.268 | n-hexadecanoic acid                                        | 3.43 |
| 22 | 14.851 | 2,2'-dihydroxydiphenylmethane                              | 3.5  |
| 23 | 15.045 | azuleno[4,5-b]furan-2(3h)-one,3a,4,6a,7,8,9,9a,9b-octahydr | 0.1  |
| 24 | 15.461 | fumaric acid, pentadecyl 2,2,2-trifluoroethyl ester        | 0.3  |
| 25 | 15.584 | 9,12-octadecadienoic acid (z,z)-, methyl ester             | 0.5  |
| 26 | 15.656 | (z,z,z)-9,12,15-octadecatrienoic acid, methyl ester        | 0.9  |
| 27 | 15.755 | 2-hexadecen-1-ol, 3,7,11,15-tetramethyl-, [r-[r            | 2.3  |
| 28 | 15.998 | (z)6,(z)9-pentadecadien-1-ol                               | 3.0  |
| 29 | 16.155 | octadecanoic acid                                          | 0.6  |
| 30 | 16.314 | 2,6,10,14,18,22-tetracosahexaene, 2,6,10,15,19,23-         | 1.1  |
| 31 | 17.094 | 5,8,11,14-eicosatetraenoic acid, ethyl ester               | 0.3  |
| 32 | 17.163 | cis-5,8,11,14,17-eicosapentaenoic acid, methyl ester       | 0.1  |
| 33 | 17.233 | tert-butyldimethylsilyl ester, hexadecanoic acid,          | 0.1  |
| 34 | 17.353 | Eicosane                                                   | 5.0  |
| 35 | 17.553 | eudesma-4(14),11-diene                                     | 0.9  |
| 36 | 18.081 | 9-octadecenamide                                           | 0.1  |
| 37 | 19.050 | 17-octadecynoic acid, tert-butyldimethylsilyl ester        | 0.1  |
| 38 | 19.274 | (z)-longipinane                                            | 0.2  |
| 39 | 19.775 | hexadecanoic acid, 2-hydroxy-1-(hydroxymethyl)ethyl ester  | 0.3  |

|    |        |                                 |             |
|----|--------|---------------------------------|-------------|
| 40 | 20.041 | Cignolin                        | 0.1         |
| 41 | 20.379 | isooctyl phthalate              | 0.5         |
| 42 | 22.667 | Nonadecane                      | 0.8         |
| 43 | 24.082 | dioctylsebacate                 | 0.1         |
| 44 | 25.054 | Dotriacontane                   | 2.9         |
| 45 | 65.671 | 5h-naphtho[2,3]carbazole        | 2.9         |
| 46 | 26.344 | 2-bromo dodecane                | 0.2         |
| 47 | 29.716 | 10-epi- $\alpha$ -eudesmol      | 1.6         |
| 48 | 30.806 | delta.5-ergosterol              | 4.3         |
| 49 | 31.497 | Stigmasterol                    | 1.2         |
| 50 | 32.870 | (3 $\beta$ ) stigmast-5-en-3-ol | 0.8         |
| 51 | 35.734 | riccardin c                     | 64.4        |
|    |        | <b>Total =</b>                  | <b>100%</b> |
